# Supplementary material for: Polarized Sonic Hedgehog Protein Localization and a Shift in the Expression of Region-Specific Molecules Is Associated With the Secondary Palate Development in the Veiled Chameleon
Source: PubMed Central journal article supplement (PMC7399257; doi:10.3389/fcell.2020.00572), 2020-07-28
Supplement: Table_1.pdf [file Table_1.pdf]

**Table S1: List of contigs used for primer and probe synthesis**

| gene  | obtained from                              | name of contig                                                              | best percent identity | best percent identity to |
|-------|--------------------------------------------|-----------------------------------------------------------------------------|-----------------------|--------------------------|
| MEOX2 | C.calyptratus_annotated_meta_transcriptome | D1_embryo_assembly_TRINITY_DN59016_c3_g5_i2_Swissprot_sp P50222 MEOX2_HUMAN | 87.38%                | XM_020782199.1           |
| PAX9  | C.calyptratus_annotated_meta_transcriptome | D1_tissue_assembly_TRINITY_DN47668_c3_g2_i9_Swissprot_sp Q2VL51 PAX9_LEPED  | 79.07%                | XM_028720443.1           |
| PAX9  | C.calyptratus_annotated_meta_transcriptome | D1_tissue_assembly_TRINITY_DN33051_c0_g1_i1_Swissprot_sp Q2VL56 PAX9_SAGOE  | 88.51%                | XM_028720443.1           |
| PAX9  | C.calyptratus_embryo_transcriptome_fpkms_1 | TRINITY_DN59367_c1_g2_i11_1                                                 | 79.07%                | XM_028720443.1           |
| MSX1  | C.calyptratus_tissue_transcriptome_fpkms_1 | CL3504Contig1_1                                                             | 86.46%                | XM_020805799.1           |
| MSX1  | C.calyptratus_embryo_transcriptome_fpkms_1 | TRINITY_DN55566_c3_g1_i5_1                                                  | 86.22%                | XM_020805799.1           |
| MSX1  | C.calyptratus_tissue_transcriptome_fpkms_1 | CL19192Contig1_1                                                            | 86.13%                | XM_020805799.1           |
| HPRT  | C.calyptratus_annotated_meta_transcriptome | D1_embryo_assembly_TRINITY_DN53192_c6_g1_i4_Swissprot_sp Q9W719 HPRT_CHICK  | 82.34%                | XM_020810323.1           |
| HPRT  | C.calyptratus_annotated_meta_transcriptome | D1_embryo_assembly_TRINITY_DN53192_c6_g1_i8_Swissprot_sp Q9W719 HPRT_CHICK  | 81.18%                | XM_020810323.1           |
| HPRT  | C.calyptratus_annotated_meta_transcriptome | D1_tissue_assembly_TRINITY_DN45027_c0_g1_i2_Swissprot_sp Q9W719 HPRT_CHICK  | 91.07%                | XM_020810323.1           |
