# Supplementary material for: Polarized Sonic Hedgehog Protein Localization and a Shift in the Expression of Region-Specific Molecules Is Associated With the Secondary Palate Development in the Veiled Chameleon
Source: PubMed Central journal article supplement (PMC7399257; doi:10.3389/fcell.2020.00572), 2020-07-28
Supplement: Table_2.pdf [file Table_2.pdf]

**Table S2: List of primers for PCR and QPCR**

| gene         | forward                        | reverse                     |
|--------------|--------------------------------|-----------------------------|
| <i>Msx1</i>  | 5`-ACGTGTGCCGCATAGAGTC-3`      | 5`-ATTTTGCCGTCGGGGGATTA-3`  |
| <i>Meox2</i> | 5`-ACGGCTTTCACCAAAGAGCA-3`     | 5`-CAAGGCACGTTTAAGGTGTGG-3` |
| <i>Pax9</i>  | 5`-AGCACCACCACCAATATGCC-3`     | 5`-AGAGACTCCTGACCCACAT-3`   |
| <i>Hprt1</i> | 5`-ACAGAAAGATTGGCACGGGA-<br>3` | 5`-AGTTGAGAGATCGTCACCGC-3`  |
